1 **Title: Exploring the effects of BCG vaccination in patients diagnosed with**  
2 **tuberculosis: observational study using the Enhanced Tuberculosis**  
3 **Surveillance system**

4 Sam Abbott, Hannah Christensen, Maeve K Lalor, Dominik Zenner, Colin Campbell, Mary  
5 Ramsay, Ellen Brooks-Pollock

6 **Authors:**

7 Sam Abbott, Bristol Medical School: Population Health Sciences, University of Bristol,  
8 Bristol, UK

9 Hannah Christensen, Bristol Medical School: Population Health Sciences, University of  
10 Bristol, Bristol, UK

11 Maeve K Lalor, TB section, National Infection Service, Public Health England, London, UK

12 Dominik Zenner, Respiratory Diseases Department, Centre for Infectious Disease  
13 Surveillance and Control (CIDSC), National Infections Service, Public Health England,  
14 London, UK

15 Colin Campbell, National Infection Service, Public Health England, London, UK

16 Mary E Ramsay, Immunisation, Hepatitis and Blood safety department, Public Health  
17 England, London, UK

18 Ellen Brooks-Pollock, Bristol Medical School: Population Health Sciences, University of  
19 Bristol, Bristol, UK

20 **Correspondence to:** Sam Abbott, Bristol Medical School: Population Health Sciences,  
21 University of Bristol, Bristol BS8 2BN, UK; [sam.abbott@bristol.ac.uk](mailto:sam.abbott@bristol.ac.uk); 01173310185

22 **WORD COUNT: Title 19 (20), Abstract 220 (300), Paper 2790 (5000)**



1

## 2 **ABSTRACT**

### 3 **Background**

4 Bacillus Calmette–Guérin (BCG) is one of the most widely-used vaccines worldwide. BCG  
5 primarily reduces the progression from infection to disease, however there is evidence that  
6 BCG may provide additional benefits. We aimed to investigate whether there is evidence in  
7 routinely-collected surveillance data that BCG vaccination impacts outcomes for  
8 tuberculosis (TB) cases in England.

### 9 **Methods**

10 We obtained all TB notifications for 2009-2015 in England from the Enhanced Tuberculosis  
11 surveillance system. We considered five outcomes: All-cause mortality, death due to TB (in  
12 those who died), recurrent TB, pulmonary disease, and sputum smear status. We used  
13 logistic regression, with complete case analysis, to investigate each outcome with BCG  
14 vaccination, years since vaccination and age at vaccination, adjusting for potential  
15 confounders. All analyses were repeated using multiply imputed data.

### 16 **Results**

17 We found evidence of an association between BCG vaccination and reduced all-cause  
18 mortality (aOR:0.76 (95%CI 0.64 to 0.89), P:0.001) and weak evidence of an association  
19 with reduced recurrent TB (aOR:0.90 (95%CI 0.81 to 1.00), P:0.056). Analyses using  
20 multiple imputation suggested that the benefits of vaccination for all-cause mortality were  
21 reduced after 10 years.

### 22 **Conclusions**

23 We found that BCG vaccination was associated with reduced all-cause mortality in people  
24 with TB although this benefit was less pronounced more than 10 years after vaccination.  
25 There was weak evidence of an association with reduced recurrent TB.

26 **Keywords:** Tuberculosis, BCG, Surveillance, Non-specific, Mortality

### 27 **Highlights**

- 28 • Found evidence of an association between BCG vaccination and reduced all-cause  
29 mortality in TB cases.
- 30 • Weaker evidence of an association between BCG vaccination and reduced repeat TB  
31 episodes in TB cases.
- 32 • There was little evidence of an association with other TB outcomes.
- 33 • We explored the identified associations by age and time since vaccination.

1

## 2 INTRODUCTION

3 Bacillus Calmette–Guérin (BCG) is one of the mostly widely-used vaccines and the only  
4 vaccine that protects against tuberculosis (TB) disease. BCG was first used in humans in  
5 1921 and was introduced into the WHO Expanded Program on Immunization in 1974.[1]  
6 BCG vaccination has been controversial due to its variable efficacy and possibility of  
7 causing a false positive result with the standard skin test for TB.[2] However, the lack of a  
8 more effective vaccine and the emergence of drug-resistant TB strains means that BCG  
9 remains the best available vaccination for TB.

10 BCG's primary mode of action is to directly prevent the development of active, symptomatic  
11 disease. Its efficacy in adults is context specific, with estimates ranging between 0% and  
12 78%.[3] Efficacy has been shown to be dependent on previous exposure, with unexposed  
13 individuals receiving the greatest benefit.[4] Unlike in adults, BCG has consistently been  
14 shown to be highly protective against TB and TB meningitis in children.[5,6] For this  
15 reason the majority of countries that use BCG vaccinate at birth.[7,8] Adult vaccination is  
16 no longer common in the UK, where universal BCG vaccination of adolescents was stopped  
17 in 2005 in favour of a targeted neonatal programme aimed at high risk children.

18 Vaccination policy has been primarily based on reducing the incidence of active TB and  
19 little attention has been given to any additional effects of BCG.[9,10] There is some  
20 evidence that BCG vaccination induces innate immune responses which may provide non-  
21 specific protection,[11] TB patients with BCG scars were found to respond better to  
22 treatment with earlier sputum smear conversion,[12] and there is evidence to suggest that  
23 BCG vaccination is associated with reduced all-cause neonatal mortality[13,14] and both  
24 reduced TB[15] and all-cause[16] mortality in the general population. Given that the  
25 immunology behind TB immunity is not well understood these findings suggest that BCG  
26 may play a more important role in improving TB outcomes than previously thought. We  
27 aimed to quantify the effects of BCG vaccination on outcomes for individuals with notified  
28 TB in England using routinely collected surveillance data to provide evidence for  
29 appropriate public health action and provision. Where we found an association, we  
30 additionally explored the role of years since vaccination, and age at vaccination.

1

## 2 **METHOD**

### 3 **Enhanced Tuberculosis Surveillance (ETS) system**

4 We extracted all notifications from the Enhanced Tuberculosis Surveillance (ETS) system  
5 from January 1, 2009 to December 31, 2015. BCG vaccination status and year of vaccination  
6 have been collected since 2008. We considered five TB outcomes which were selected due  
7 to their association with increased case infectiousness or poor consequences for patients  
8 (table 1).

#### 9 **Table 1: Summary of outcome definitions and rationale for inclusion**

| Outcome                             | Definition                                                                                                                                                                                                                                                                                                                                                                                         |
|-------------------------------------|----------------------------------------------------------------------------------------------------------------------------------------------------------------------------------------------------------------------------------------------------------------------------------------------------------------------------------------------------------------------------------------------------|
| All-cause mortality                 | All-cause mortality was defined using the overall outcome recorded in ETS, this is based on follow up at 12, 24, and 36 months (or until treatment completion). If a case dies within 12 months of completing treatment, from TB or from a cause related to TB then their overall outcome will be updated in the ETS. Those that were lost to follow up, or not evaluated were treated as missing. |
| Death due to TB (in those who died) | For cases with a known cause of death, death due to TB is defined as those that died from TB, or where TB had contributed to their death.                                                                                                                                                                                                                                                          |
| Recurrent TB                        | TB cases who had recurrent episodes were identified in the dataset.                                                                                                                                                                                                                                                                                                                                |
| Pulmonary disease                   | Cases that present with pulmonary TB (regardless of extra-pulmonary TB status).                                                                                                                                                                                                                                                                                                                    |
| Sputum smear status - positive      | Status of sputum sample tested for Acid-Fast Bacilli.                                                                                                                                                                                                                                                                                                                                              |

#### 10 **Exposure variables relating to BCG**

11 We included three exposure variables related to BCG: BCG status (vaccinated, yes/no),  
12 years since vaccination and age at vaccination.

13 BCG status was taken directly from the ETS. Years since BCG vaccination was defined as  
14 year of notification minus year of vaccination and categorised into two groups (0 to 10 and  
15 11+ years), based on evidence that the average duration of BCG protection is 10-15  
16 years.[15] Age at vaccination is defined in the online supplementary information.

#### 17 **Statistical Analysis**

18 R was used for all statistical analysis.[17] The analysis was conducted in two stages. Firstly,  
19 we calculated proportions for all demographic and outcome variables, and compared  
20 vaccinated and unvaccinated TB cases using the  $\chi^2$  test. Secondly, we used logistic

1 regression, with complete case analysis, to estimate the association between exposures and  
2 outcome variables, both with and without adjustment for confounders.

3 In the multivariable models, we adjusted for sex,[18–20] age,[21] Index of Multiple  
4 Deprivation (2010) categorised into five groups for England (IMD rank),[22,23]  
5 ethnicity,[18,24] UK birth status,[25,26] and year of notification. As the relationship  
6 between age and outcomes was non-linear, we modelled age using a natural cubic spline  
7 with knots at the 25%, 50% and 75% quantiles.

8 We conducted sensitivity analyses to assess the robustness of the results, by dropping each  
9 confounding variable in turn and assessing the effect on the adjusted Odds Ratios (aORs) of  
10 the exposure variable. We repeated the analysis excluding duplicate recurrent cases, and  
11 restricting the study population to those eligible for the BCG schools scheme (defined as UK  
12 born cases that were aged 14 or over in 2004) to assess the comparability of the BCG  
13 vaccinated and unvaccinated populations. To mitigate the impact of missing data we used  
14 multiple imputation, with the MICE package.[27] We imputed 50 data sets (for 20  
15 iterations) using all variables included in the analysis as predictors along with Public  
16 Health England centre. The model results were pooled using the small sample method,[28]  
17 and effect sizes compared with those from the main analysis.

## 18 **RESULTS**

### 19 **Description of the data**

20 There were 51,645 TB notifications between 2009-2015 in England. Reporting of  
21 vaccination status and year of vaccination improved over time: 64.9% (20865/32154) of  
22 notifications included vaccination status for 2009 to 2012, increasing to 70%  
23 (13647/19491) from 2013 to 2015. The majority of cases that had a known vaccination  
24 status were vaccinated (70.6%, 24354/34512), and where age and year of vaccination was  
25 known, the majority of cases were vaccinated at birth (60%, 5979/10066).

26 Vaccinated cases were younger than unvaccinated cases on average (median age 34 years  
27 (IQR 26 to 45) compared to 38 years (IQR 26 to 62)). A higher proportion of non-UK born  
28 cases were BCG vaccinated, (72.7%, 18297/25171) compared to UK born cases (65.2%,  
29 5787/8871,  $P < 0.001$ ) and, of those vaccinated, a higher proportion of non-UK born cases  
30 were vaccinated at birth compared to UK born cases (68%, 4691/6896 vs. 40.5%,  
31 1253/3096 respectively,  $P < 0.001$ ). See online supplementary table S1 for the breakdown  
32 of outcome variables and supplementary table S2 for the breakdown of confounding  
33 variables.

### 34 **All-cause mortality**

35 In the univariable analysis the odds of death from any cause were lower for BCG vaccinated  
36 TB cases compared to unvaccinated cases, with an OR of 0.28 (95% CI 0.24 to 0.32,  $P < 0.001$ ) (table 2, see supplementary table S3 for the full table); an association remained  
37 after adjusting for confounders, but was attenuated with an aOR of 0.76 (95% CI 0.64 to  
38 0.89,  $P < 0.001$ ). We estimate that if all unvaccinated cases had been vaccinated there would  
39 have been on average 19 (95% CI 9 to 29) fewer deaths per year during the study period  
40

1 (out of 81 deaths per year on average in unvaccinated cases). Whilst there was evidence in  
2 univariable analyses to suggest all-cause mortality was higher in persons vaccinated more  
3 than 10 years prior to notification of TB and that all-cause mortality increased with  
4 increasing age group, these disappeared after adjusting for potential confounders (table 3,  
5 supplementary table S4).

6 Similar results to the multivariable analysis were found using multiply imputed data for the  
7 association between vaccination status and all-cause mortality (aOR: 0.76 (95% CI 0.61 to  
8 0.94), P: 0.013), but not for time since vaccination with a greatly increased risk of all-cause  
9 mortality estimated for those vaccinated more than 10 years before case notification,  
10 compared to those vaccinated more recently (aOR: 12.19 (95% CI 3.48 to 42.64), (see  
11 online supplementary table S5, supplementary table S6)). For age at vaccination results for  
12 the multivariable analysis using multiply imputed data were comparable to those found  
13 using complete case analysis, except that there was some evidence that vaccination in  
14 adolescence, compared to under 1, was associated with increased, rather than decreased,  
15 all-cause mortality (aOR: 1.57 (95% CI 1.13 to 2.19), supplementary table S7).

## 16 **Deaths due to TB (in those who died)**

17 There was little evidence of any association between BCG vaccination and deaths due to TB  
18 (in those who died and where cause of death was known) in the univariable analysis (table  
19 2). The adjusted point estimate indicated an association between BCG vaccination and  
20 reduced deaths due to TB (in those who died) although the confidence intervals remained  
21 wide with a similar result found using multiply imputed data (see online supplementary  
22 table S5). There were insufficient data to robustly estimate an association between deaths  
23 due to TB (in those who died) and years since vaccination or age at vaccination (table 3,  
24 supplementary table S4).

## 25 **Recurrent TB**

26 In both the univariable and multivariable analysis there was some evidence that BCG  
27 vaccination was associated with reduced recurrent TB, although the strength of the  
28 evidence was weakened after adjusting for confounders (table 2). In the adjusted analysis,  
29 the odds of recurrent TB were lower for BCG vaccinated cases compared to unvaccinated  
30 cases, with an aOR of 0.90 (95% CI 0.81 to 1.00, P: 0.056). The strength of the evidence for  
31 this association was comparable in the analysis using multiply imputed data (see online  
32 supplementary table S5). There was little evidence in the adjusted analysis of any  
33 association between recurrent TB and years since vaccination (table 3) or age at  
34 vaccination (supplementary table S4).

## 35 **Other Outcomes**

36 After adjusting for confounders there was little evidence for any association between BCG  
37 vaccination and pulmonary disease or positive sputum smear status (table 2); similar  
38 results were found using multiply imputed data (see online supplementary table S5).

**Table 2: Summary of associations between BCG vaccination and all outcomes**

| Outcome                              | BCG vaccinated | Univariable |                        |                     |         | Multivariable |                        |                     |         |
|--------------------------------------|----------------|-------------|------------------------|---------------------|---------|---------------|------------------------|---------------------|---------|
|                                      |                | Cases*      | Cases with outcome (%) | OR (95% CI)         | P-value | Cases †       | Cases with outcome (%) | aOR (95% CI)        | P-value |
| All-cause mortality                  | No             | 9061        | 566 (6)                | 1                   | <0.001  | 7620          | 473 (6)                | 1                   | 0.001   |
|                                      | Yes            | 21685       | 394 (2)                | 0.28 (0.24 to 0.32) |         | 1837<br>3     | 334 (2)                | 0.76 (0.64 to 0.89) |         |
| Death due to TB (in those who died‡) | No             | 320         | 174 (54)               | 1                   | 0.786   | 270           | 143 (53)               | 1                   | 0.177   |
|                                      | Yes            | 276         | 147 (53)               | 0.96 (0.69 to 1.32) |         | 236           | 126 (53)               | 0.76 (0.51 to 1.13) |         |
| Recurrent TB                         | No             | 9991        | 735 (7)                | 1                   | <0.001  | 8502          | 615 (7)                | 1                   | 0.056   |
|                                      | Yes            | 23963       | 1371 (6)               | 0.76 (0.70 to 0.84) |         | 2058<br>4     | 1177 (6)               | 0.90 (0.81 to 1.00) |         |
| Pulmonary TB                         | No             | 10121       | 5548 (55)              | 1                   | <0.001  | 8595          | 4685 (55)              | 1                   | 0.769   |
|                                      | Yes            | 24289       | 12204 (50)             | 0.83 (0.79 to 0.87) |         | 2078<br>4     | 10342 (50)             | 0.99 (0.94 to 1.05) |         |
| Sputum smear status - positive       | No             | 3910        | 1679 (43)              | 1                   | 0.187   | 3367          | 1435 (43)              | 1                   | 0.730   |
|                                      | Yes            | 9768        | 4074 (42)              | 0.95 (0.88 to 1.02) |         | 8351          | 3447 (41)              | 1.02 (0.93 to 1.11) |         |

OR (95% CI): unadjusted odds ratio with 95% confidence intervals,

aOR (95% CI): adjusted odds ratios with 95% confidence intervals,

\* Univariable sample size for outcomes ordered as in table (% of all cases) = 30746 (60%), 596 (23%), 33954 (66%), 34410 (67%), 13678 (26%),

† Multivariable sample size with outcomes ordered as in table (% of all cases) = 25993 (50%), 506 (20%), 29086 (56%), 29379 (57%), 11718 (23%),



---

‡ Death due to TB in those who died and where cause of death was known

---

**Table 3:** Summary of associations between years since vaccination and all outcomes in individuals who were vaccinated. The baseline exposure is vaccination  $\leq 10$  years before diagnosis compared to vaccination 11 + years before diagnosis. Deaths due to TB (in those who died) had insufficient data for effect sizes to be estimated in both the univariable and multivariable analysis.

| Outcome                              | Years since BCG | Univariable |                        |                          |         | Multivariable |                        |                          |         |
|--------------------------------------|-----------------|-------------|------------------------|--------------------------|---------|---------------|------------------------|--------------------------|---------|
|                                      |                 | Cases*      | Cases with outcome (%) | OR (95% CI)              | P-value | Cases†        | Cases with outcome (%) | aOR (95% CI)             | P-value |
| All-cause mortality                  | $\leq 10$       | 718         | 5 (1)                  | 1                        | 0.004   | 554           | 4 (1)                  | 1                        | 0.897   |
|                                      | 11+             | 8106        | 166 (2)                | 2.98 (1.22 to 7.28)      |         | 7171          | 148 (2)                | 0.91 (0.24 to 3.54)      |         |
| Death due to TB (in those who died‡) | $\leq 10$       | 2           | 2 (100)                | 1                        | -       | 2             | 2 (100)                | 1                        | -       |
|                                      | 11+             | 108         | 59 (55)                | <i>Insufficient data</i> |         | 98            | 53 (54)                | <i>Insufficient data</i> |         |
| Recurrent TB                         | $\leq 10$       | 780         | 22 (3)                 | 1                        | 0.005   | 613           | 14 (2)                 | 1                        | 0.515   |
|                                      | 11+             | 9172        | 451 (5)                | 1.78 (1.15 to 2.75)      |         | 8194          | 406 (5)                | 1.24 (0.63 to 2.44)      |         |
| Pulmonary TB                         | $\leq 10$       | 770         | 480 (62)               | 1                        | <0.001  | 601           | 382 (64)               | 1                        | 0.309   |
|                                      | 11+             | 9248        | 4757 (51)              | 0.64 (0.55 to 0.74)      |         | 8254          | 4232 (51)              | 0.87 (0.67 to 1.14)      |         |
| Sputum smear status - positive       | $\leq 10$       | 157         | 81 (52)                | 1                        | 0.941   | 122           | 61 (50)                | 1                        | 0.920   |
|                                      | 11+             | 3064        | 1590 (52)              | 1.01 (0.73 to 1.40)      |         | 2734          | 1405 (51)              | 1.02 (0.68 to 1.54)      |         |

OR (95% CI): unadjusted odds ratio with 95% confidence intervals, aOR (95% CI): adjusted odds ratios with 95% confidence intervals,

\* Univariable sample size for outcomes ordered as in table (% of vaccinated cases) = 8824 (36%), 110 (28%), 9952 (41%), 10018 (41%), 3221 (13%),

† Multivariable sample size with outcomes ordered as in table (% of vaccinated cases) = 7725 (32%), 100 (25%), 8807 (36%), 8855 (36%), 2856 (12%),

‡ Death due to TB in those who died and where cause of death was known

## 1 **Sensitivity analysis**

2 Dropping duplicate recurrent TB notifications increased the magnitude, and precision, of  
3 the effect sizes for recurrent TB, all-cause mortality, and deaths due to TB (in those who  
4 died) (see online supplementary table S8). Restricting the analysis to only cases that were  
5 eligible for the BCG schools scheme reduced the sample size of the analysis (from an initial  
6 study size of 51645, of which 12832 were UK born, to 9943 cases that would have been  
7 eligible for the BCG schools scheme). With this reduced sample size, there was strong  
8 evidence in adjusted analyses of an association between BCG vaccination and reduced  
9 recurrent TB, and evidence of an association with decreased all-cause mortality (see online  
10 supplementary table S8).

1

## 2 **DISCUSSION**

3 Using TB surveillance data collected in England we found that BCG vaccination, prior to the  
4 development of active TB, was associated with reduced all-cause mortality and fewer  
5 recurrent TB cases, although the evidence for this association was weaker. There was some  
6 suggestion that the association with all-cause mortality was due to reduced deaths due to  
7 TB (in those who died), though the study was underpowered to definitively assess this. We  
8 did not find evidence of an association between BCG status and positive smear status or  
9 pulmonary TB. Analysis with multiply imputed data indicated that notification 10+ years  
10 after vaccination was associated with increased all-cause mortality. In separate analyses,  
11 there was some evidence that vaccination at birth, compared to at any other age, was  
12 associated with reduced all-cause mortality, and increased deaths due to TB (in those who  
13 died).

14 This study used a large detailed dataset, with coverage across demographic groups, and  
15 standardized data collection from notifications and laboratories. The use of routine  
16 surveillance data means that this study would be readily repeatable with new data. The  
17 surveillance data contained multiple known risk factors, this allowed us to adjust for these  
18 confounders in the multivariable analysis, which attenuated the evidence for an association  
19 with BCG vaccination for all outcomes. However, there are important limitations to  
20 consider. The study was conducted within a population of active TB cases, therefore the  
21 association with all-cause mortality cannot be extrapolated to the general population.  
22 Additionally, vaccinated and unvaccinated populations may not be directly comparable  
23 because vaccination has been targeted at high-risk neonates in the UK since 2005. We  
24 mitigated this potential source for bias by conducting a sensitivity analysis including only  
25 those eligible for the universal school age scheme, and whilst the strength of associations  
26 were attenuated there remained some evidence of improved outcomes. Sensitivity analysis  
27 excluding recurrent cases indicated their inclusion may have biased our results towards  
28 the null.

29 Variable data completeness changed with time, with both BCG vaccination status and year  
30 of vaccination having a high percentage of missing data, which may not be missing  
31 completely at random. We therefore checked the robustness of our results with multiple  
32 imputation including regional variability, however an unknown missing not at random  
33 mechanism, or unmeasured confounding may still have introduced bias. We found a greatly  
34 increased risk of all-cause mortality for those vaccinated more than 10 years ago in the  
35 analysis with multiply imputed data, compared to the complete case analysis. This is likely  
36 to be driven by a missing not at random mechanism for years since vaccination, with older  
37 cases being both more likely to have been vaccinated more than 10 years previously and to  
38 also have an unknown year of vaccination. The high percentage of missing data also means  
39 that we were likely to be underpowered to detect an effect of BCG vaccination on sputum  
40 smear status and deaths due to TB (in those who died), with years since vaccination, and  
41 age at vaccination likely to be underpowered for all outcomes. We were not able to adjust  
42 for either tuberculin skin test (TST) stringency, or the latitude effect, although we were  
43 able to adjust for UK birth status.[29] However, the bias induced by these confounders is  
44 likely to be towards the null, meaning that our effect estimates are likely to be conservative.

1 Finally, BCG vaccination status may be subject to misclassification due to recall bias;  
2 validation studies of the recording of BCG status in the ETS would be required to assess  
3 this.

4 Little work has been done to assess the overall effect of BCG on outcomes for active TB  
5 cases although the possible non-specific effects of BCG are an area of active  
6 research.[14,30,31] Whilst multiple studies have investigated BCG's association with all-  
7 cause mortality, it has been difficult to assess whether the association continues beyond  
8 the first year of life.[31] The effect size of the association we identified between BCG and  
9 all-cause mortality in active TB cases was comparable to that found in a Danish case-cohort  
10 study in the general population (aHR: 0.58 (95% CI 0.39 to 0.85)).[16] A recent systematic  
11 review also found that BCG vaccination was associated with reduced all-cause mortality in  
12 neonates, with an average relative risk of 0.70 (95% CI 0.49 to 1.01) from five clinical trials  
13 and 0.47 (95% CI 0.32 to 0.69) from nine observational studies at high risk of bias.[14] We  
14 found some weak evidence that BCG vaccination was associated with reduced deaths due  
15 to TB (in those who died), although our point estimate had large confidence intervals.  
16 Several meta-analyses have found evidence supporting this association,[6,15] with one  
17 meta-analysis estimating a 71% (RR: 0.29 95% CI 0.16 to 0.53) reduction in deaths due to  
18 TB in individuals vaccinated with BCG.[6] The meta-analysis performed by Abubakar et  
19 al. also found consistent evidence for this association, with a Rate Ratio of 0.22 (95% CI  
20 0.15 to 0.33).[15] In contrast to our study, both of these meta-analyses estimated the  
21 protection from TB mortality in BCG vaccinated individuals rather than in BCG vaccinated  
22 cases who had died from any cause. Additionally, neither study explored the association  
23 between BCG vaccination and all-cause mortality or recurrent TB. This study could not  
24 determine the possible causal pathway for the association between BCG vaccination all-  
25 cause mortality, and recurrent TB. These are important to establish in order to understand  
26 the effect of BCG vaccination on TB outcomes.

27 We found that BCG vaccination was associated with reduced all-cause mortality, with some  
28 weaker evidence of an association with reduced recurrent TB. A plausible mechanism for  
29 this association is that BCG vaccination improves treatment outcomes,[12] which then  
30 results in decreased mortality, and reduced recurrent TB. However, these effects may also  
31 be independent and for all-cause mortality may not be directly related to active TB. In this  
32 case, a possible mechanism for the association between BCG vaccination and all-cause  
33 mortality is that BCG vaccination modulates the innate immune response, resulting in non-  
34 specific protection.[11] For low incidence countries, where the reduction in TB cases has  
35 been used as evidence to scale back vaccination programs,[7] these results suggest that  
36 BCG vaccination may be more beneficial than previously thought. In countries that target  
37 vaccination at those considered to be at high risk of TB the results from this study could be  
38 used to help drive uptake by providing additional incentives for vaccination. The evidence  
39 we have presented should be considered in future cost-effectiveness studies of BCG  
40 vaccination programs.

41 Further work is required to determine whether years since vaccination and age at  
42 vaccination are associated with TB outcomes as this study was limited by low sample size,  
43 missing data for year of vaccination, and the relative rarity of some TB outcomes. However,  
44 due to the continuous collection of the surveillance data used in this analysis, this study

1 could be repeated once additional data have been collected. The results from this study  
2 require validation in independent datasets and the analysis should be reproducible in other  
3 low incidence countries that have similarly developed surveillance systems. If validated in  
4 low incidence countries, similar studies in medium to high incidence countries should be  
5 conducted because any effect would have a greater impact in these settings.

## 6 **Acknowledgements**

7 The authors thank the TB section at Public Health England (PHE) for maintaining the  
8 Enhanced Tuberculosis Surveillance (ETS) system; all the healthcare workers involved in  
9 data collection for the ETS.

## 10 **Contributors**

11 SA, HC, and EBP conceived and designed the work. SA undertook the analysis with advice  
12 from all other authors. All authors contributed to the interpretation of the data. SA wrote  
13 the first draft of the paper and all authors contributed to subsequent drafts. All authors  
14 approve the work for publication and agree to be accountable for the work.

## 15 **Funding**

16 SEA, HC, and EBP are funded by the National Institute for Health Research Health  
17 Protection Research Unit (NIHR HPRU) in Evaluation of Interventions at University of  
18 Bristol in partnership with Public Health England (PHE). The views expressed are those of  
19 the author(s) and not necessarily those of the NHS, the NIHR, the Department of Health or  
20 Public Health England.

## 21 **Conflicts of interest**

22 HC reports receiving honoraria from Sanofi Pasteur, and consultancy fees from  
23 AstraZeneca, GSK and IMS Health, all paid to her employer.

## 24 **Accessibility of data and programming code**

25 The code for the analysis contained in this paper can be found at:  
26 [doi.org/10.5281/zenodo.1213799](https://doi.org/10.5281/zenodo.1213799)

27

1

## 2 REFERENCES

- 3 [1] The World Health Organization. BCG Vaccine. Weekly Epidemiological Record  
4 2004;79:27–48.
- 5 [2] Zwerling A, Behr MA, Verma A, Brewer TF, Menzies D, Pai M. The BCG world atlas: A  
6 database of global BCG vaccination policies and practices. PLoS Medicine 2011;8.  
7 doi:[10.1371/journal.pmed.1001012](https://doi.org/10.1371/journal.pmed.1001012).
- 8 [3] Mangtani P, Abubakar I, Ariti C, Beynon R, Pimpin L, Fine PEM, et al. Protection by BCG  
9 Vaccine Against Tuberculosis: A Systematic Review of Randomized Controlled Trials.  
10 Clinical Infectious Diseases 2014;58:470–80. doi:[10.1093/cid/cit790](https://doi.org/10.1093/cid/cit790).
- 11 [4] Barreto ML, Pilger D, Pereira SM, Genser B, Cruz AA, Cunha SS, et al. Causes of variation  
12 in BCG vaccine efficacy: Examining evidence from the BCG REVAC cluster randomized trial  
13 to explore the masking and the blocking hypotheses. Vaccine 2014;32:3759–64.  
14 doi:[10.1016/j.vaccine.2014.05.042](https://doi.org/10.1016/j.vaccine.2014.05.042).
- 15 [5] Rodrigues LC, Diwan VK, Wheeler JG. Protective effect of BCG against tuberculous  
16 meningitis and miliary tuberculosis: a meta-analysis. International Journal of Epidemiology  
17 1993;22:1154–8.
- 18 [6] Colditz GA, Brewer TF, Berkey CS, Wilson ME, Burdick E, Fineberg HV, et al. Efficacy of  
19 BCG Vaccine in the Prevention of Tuberculosis. JAMA 1994;271:698.  
20 doi:[10.1001/jama.1994.03510330076038](https://doi.org/10.1001/jama.1994.03510330076038).
- 21 [7] Zwerling A, Behr MA, Verma A, Brewer TF, Menzies D, Pai M. The BCG World Atlas: a  
22 database of global BCG vaccination policies and practices. PLoS Medicine 2011;8:e1001012.  
23 doi:[10.1371/journal.pmed.1001012](https://doi.org/10.1371/journal.pmed.1001012).
- 24 [8] Organization WH, Appia A, Geneva C. BCG vaccine : WHO position paper , February  
25 2018 – Recommendations. Vaccine 2018;36:3408–10. doi:[10.1016/j.vaccine.2018.03.009](https://doi.org/10.1016/j.vaccine.2018.03.009).
- 26 [9] Fine P. Stopping routine vaccination for tuberculosis in schools. BMJ (Clinical Research  
27 Ed) 2005;331:647–8. doi:[10.1136/bmj.331.7518.647](https://doi.org/10.1136/bmj.331.7518.647).
- 28 [10] Teo SSS. Does BCG have a role in tuberculosis control and prevention in the United  
29 Kingdom? Archives of Disease in Childhood 2006;91:529–31.  
30 doi:[10.1136/adc.2005.085043](https://doi.org/10.1136/adc.2005.085043).
- 31 [11] Kleinnijenhuis J, Quintin J, Preijers F, Joosten LAB, Ifrim DC, Saeed S, et al. Bacille  
32 Calmette-Guerin induces NOD2-dependent nonspecific protection from reinfection via  
33 epigenetic reprogramming of monocytes. Proceedings of the National Academy of Sciences  
34 of the United States of America 2012;109:17537–42. doi:[10.1073/pnas.1202870109](https://doi.org/10.1073/pnas.1202870109).
- 35 [12] Jeremiah K, Praygod G, Faurholt-Jepsen D, Range N, Andersen AB, Grewal HMS, et al.  
36 BCG vaccination status may predict sputum conversion in patients with pulmonary  
37 tuberculosis: a new consideration for an old vaccine? Thorax 2010;65:1072–6.  
38 doi:[10.1136/thx.2010.134767](https://doi.org/10.1136/thx.2010.134767).

- 1 [13] Garly ML, Martins CL, Balé C, Baldé MA, Hedegaard KL, Gustafson P, et al. BCG scar and  
2 positive tuberculin reaction associated with reduced child mortality in West Africa: A non-  
3 specific beneficial effect of BCG? *Vaccine* 2003;21:2782–90. doi:[10.1016/S0264-](https://doi.org/10.1016/S0264-410X(03)00181-6)  
4 [410X\(03\)00181-6](https://doi.org/10.1016/S0264-410X(03)00181-6).
- 5 [14] Higgins JPT, Soares-weiser K, López-lópez JA, Kakourou A, Chaplin K, Christensen H, et  
6 al. Association of BCG , DTP , and measles containing vaccines with childhood mortality :  
7 systematic review n.d. doi:[10.1136/bmj.i5170](https://doi.org/10.1136/bmj.i5170).
- 8 [15] Abubakar I, Pimpin L, Ariti C, Beynon R, Mangtani P, Sterne J a C, et al. Systematic  
9 review and meta-analysis of the current evidence on the duration of protection by bacillus  
10 Calmette-Guérin vaccination against tuberculosis. *Health Technology Assessment*  
11 2013;17:1–372, v–vi. doi:[10.3310/hta17370](https://doi.org/10.3310/hta17370).
- 12 [16] Rieckmann A, Villumsen M, Sørup S, Haugaard LK, Ravn H, Roth A, et al. Vaccinations  
13 against smallpox and tuberculosis are associated with better long-term survival: a Danish  
14 case-cohort study 1971–2010. *International Journal of Epidemiology* 2016;94:dyw120.  
15 doi:[10.1093/ije/dyw120](https://doi.org/10.1093/ije/dyw120).
- 16 [17] R Core Team. R: A Language and Environment for Statistical Computing 2016.
- 17 [18] Parslow R, El-Shimy NA, Cundall DB, McKinney PA. Tuberculosis, deprivation, and  
18 ethnicity in Leeds, UK, 1982-1997. *Archives of Disease in Childhood* 2001;84:109–13.  
19 doi:[10.1136/adc.84.2.109](https://doi.org/10.1136/adc.84.2.109).
- 20 [19] Roth A, Sodemann M, Jensen H, Poulsen A, Gustafson P, Weise C, et al. Tuberculin  
21 reaction, BCG scar, and lower female mortality. *Epidemiology (Cambridge, Mass)*  
22 2006;17:562–8. doi:[10.1097/01.ede.0000231546.14749.ab](https://doi.org/10.1097/01.ede.0000231546.14749.ab).
- 23 [20] Aaby P, Nielsen J, Benn CS, Trape JF. Sex-differential and non-specific effects of routine  
24 vaccinations in a rural area with low vaccination coverage: An observational study from  
25 Senegal. *Transactions of the Royal Society of Tropical Medicine and Hygiene* 2014;109:77–  
26 84. doi:[10.1093/trstmh/tru186](https://doi.org/10.1093/trstmh/tru186).
- 27 [21] Teale C, Goldman JM, Pearson SB. The association of age with the presentation and  
28 outcome of tuberculosis: a five-year survey. *Age and Ageing* 1993;22:289–93.
- 29 [22] Department of Communities and Local Government. The English Indices of  
30 Deprivation 2010. 2011.  
31 doi:[http://dx.doi.org/http://www.communities.gov.uk/publications/corporate/statistics/](http://dx.doi.org/http://www.communities.gov.uk/publications/corporate/statistics/indices2010technicalreport)  
32 [indices2010technicalreport](http://dx.doi.org/http://www.communities.gov.uk/publications/corporate/statistics/indices2010technicalreport).
- 33 [23] Bhatti N, Law MR, Morris JK, Halliday R, Moore-Gillon J. Increasing incidence of  
34 tuberculosis in England and Wales: a study of the likely causes. *BMJ (Clinical Research Ed)*  
35 1995;310:967–9. doi:[10.1136/bmj.310.6985.967](https://doi.org/10.1136/bmj.310.6985.967).
- 36 [24] Abubakar I, Laundry MT, French CE, Shingadia D. Epidemiology and treatment outcome  
37 of childhood tuberculosis in England and Wales: 1999-2006. *Archives of Disease in*  
38 *Childhood* 2008;93:1017–21. doi:[10.1136/adc.2008.139543](https://doi.org/10.1136/adc.2008.139543).



- 1 [25] French CE, Antoine D, Gelb D, Jones JA, Gilbert RL, Watson JM. Tuberculosis in non-UK-  
2 born persons, England and Wales, 2001-2003. *International Journal of Tuberculosis and*  
3 *Lung Disease* 2007;11:577–84.
- 4 [26] Djuretic T, Herbert J, Drobniowski F, Yates M, Smith EG, Magee JG, et al. Antibiotic  
5 resistant tuberculosis in the United Kingdom : 2002:477–82.
- 6 [27] Van Buuren S, Groothuis-Oudshoorn K. Multivariate Imputation by Chained Equations.  
7 *Journal of Statistical Software* 2011;45:1–67. doi:[10.1177/0962280206074463](https://doi.org/10.1177/0962280206074463).
- 8 [28] Barnard J, Rubin DB. Small-sample degrees of freedom with multiple imputation.  
9 *Biometrika* 1999;86:948–55. doi:[10.1093/biomet/86.4.948](https://doi.org/10.1093/biomet/86.4.948).
- 10 [29] Roy A, Eisenhut M, Harris RJ, Rodrigues LC, Sridhar S, Habermann S, et al. Effect of BCG  
11 vaccination against Mycobacterium tuberculosis infection in children: systematic review  
12 and meta-analysis. *BMJ (Clinical Research Ed)* 2014;349:g4643. doi:[10.1136/bmj.g4643](https://doi.org/10.1136/bmj.g4643).
- 13 [30] Kandasamy R, Voysey M, McQuaid F, Nie K de, Ryan R, Orr O, et al. Non-specific  
14 immunological effects of selected routine childhood immunisations: systematic review. *Bmj*  
15 2016;i5225. doi:[10.1136/bmj.i5225](https://doi.org/10.1136/bmj.i5225).
- 16 [31] Pollard AJ, Finn A, Curtis N. Non-specific effects of vaccines: plausible and potentially  
17 important, but implications uncertain. *Archives of Disease in Childhood* 2017:archdischild-  
18 2015–310282. doi:[10.1136/archdischild-2015-310282](https://doi.org/10.1136/archdischild-2015-310282).



## Online supplementary appendix: Exploring the effects of BCG vaccination in patients diagnosed with tuberculosis: observational study using the Enhanced Tuberculosis Surveillance system

Sam Abbott, Hannah Christensen, Maeve K Lalor, Dominik Zennor, Colin Campbell, Mary Ramsay, Ellen Brooks-Pollock

### Outcome variables stratified by BCG vaccination status

**Supplementary table S1:** Outcomes for individuals in England notified with tuberculosis between 2009-2015, stratified by BCG vaccination status.

| Outcome                              | Total       | Vaccinated  | Unvaccinated | Unknown vaccine status |
|--------------------------------------|-------------|-------------|--------------|------------------------|
| Total, all cases                     | 51645       | 24354 {47}  | 10158 {20}   | 17133 {33}             |
| All-cause mortality                  | 45588 (88)  | 21685 (89)  | 9061 (89)    | 14842 (87)             |
| No                                   | 43024 [94]  | 21291 [98]  | 8495 [94]    | 13238 [89]             |
| Yes                                  | 2564 [6]    | 394 [2]     | 566 [6]      | 1604 [11]              |
| Death due to TB (in those who died*) | 1373 (3)    | 276 (1)     | 320 (3)      | 777 (5)                |
| No                                   | 572 [42]    | 129 [47]    | 146 [46]     | 297 [38]               |
| Yes                                  | 801 [58]    | 147 [53]    | 174 [54]     | 480 [62]               |
| Recurrent TB                         | 48497 (94)  | 23963 (98)  | 9991 (98)    | 14543 (85)             |
| No                                   | 44869 [93]  | 22592 [94]  | 9256 [93]    | 13021 [90]             |
| Yes                                  | 3628 [7]    | 1371 [6]    | 735 [7]      | 1522 [10]              |
| Pulmonary TB                         | 51432 (100) | 24289 (100) | 10121 (100)  | 17022 (99)             |
| Extra-pulmonary (EP) only            | 24280 [47]  | 12085 [50]  | 4573 [45]    | 7622 [45]              |
| Pulmonary, with or without EP        | 27152 [53]  | 12204 [50]  | 5548 [55]    | 9400 [55]              |
| Sputum smear status - positive       | 19551 (38)  | 9768 (40)   | 3910 (38)    | 5873 (34)              |
| Negative                             | 11060 [57]  | 5694 [58]   | 2231 [57]    | 3135 [53]              |
| Positive                             | 8491 [43]   | 4074 [42]   | 1679 [43]    | 2738 [47]              |

{% all cases}{% complete within vaccine status}[% complete within category],

\* Death due to TB in those who died and where cause of death was known

## Confounding variables stratified by BCG vaccination status

**Supplementary table S2: Confounders for individuals in England notified with tuberculosis between 2009-2015, stratified by BCG vaccination status.**

| Confounder                                                 | Total       | Vaccinated  | Unvaccinated | Unknown vaccine status |
|------------------------------------------------------------|-------------|-------------|--------------|------------------------|
| Total, all cases                                           | 51645       | 24354 {47}  | 10158 {20}   | 17133 {33}             |
| Age                                                        | 51645 (100) | 24354 (100) | 10158 (100)  | 17133 (100)            |
| Mean [SD]                                                  | 40 [19]     | 36 [16]     | 44 [22]      | 45 [20]                |
| Median [25%, 75%]                                          | 36 [27, 52] | 34 [26, 45] | 38 [26, 62]  | 41 [29, 59]            |
| Sex                                                        | 51535 (100) | 24320 (100) | 10136 (100)  | 17079 (100)            |
| Female                                                     | 22066 [43]  | 10791 [44]  | 4312 [43]    | 6963 [41]              |
| Male                                                       | 29469 [57]  | 13529 [56]  | 5824 [57]    | 10116 [59]             |
| IMD rank (with 1 as most deprived and 5 as least deprived) | 43525 (84)  | 21240 (87)  | 8866 (87)    | 13419 (78)             |
| 1                                                          | 16800 [39]  | 7779 [37]   | 3665 [41]    | 5356 [40]              |
| 2                                                          | 13057 [30]  | 6836 [32]   | 2564 [29]    | 3657 [27]              |
| 3                                                          | 6838 [16]   | 3459 [16]   | 1259 [14]    | 2120 [16]              |
| 4                                                          | 4045 [9]    | 1893 [9]    | 836 [9]      | 1316 [10]              |
| 5                                                          | 2785 [6]    | 1273 [6]    | 542 [6]      | 970 [7]                |
| UK born                                                    | 49820 (96)  | 24084 (99)  | 9958 (98)    | 15778 (92)             |
| Non-UK Born                                                | 36988 [74]  | 18297 [76]  | 6874 [69]    | 11817 [75]             |
| UK Born                                                    | 12832 [26]  | 5787 [24]   | 3084 [31]    | 3961 [25]              |
| Ethnic group                                               | 50416 (98)  | 24074 (99)  | 10024 (99)   | 16318 (95)             |
| White                                                      | 10194 [20]  | 3560 [15]   | 2695 [27]    | 3939 [24]              |
| Black-Caribbean                                            | 1112 [2]    | 559 [2]     | 242 [2]      | 311 [2]                |
| Black-African                                              | 8942 [18]   | 4620 [19]   | 1602 [16]    | 2720 [17]              |
| Black-Other                                                | 462 [1]     | 261 [1]     | 80 [1]       | 121 [1]                |
| Indian                                                     | 12994 [26]  | 7176 [30]   | 2061 [21]    | 3757 [23]              |
| Pakistani                                                  | 8237 [16]   | 3512 [15]   | 1720 [17]    | 3005 [18]              |
| Bangladeshi                                                | 2025 [4]    | 918 [4]     | 480 [5]      | 627 [4]                |
| Chinese                                                    | 601 [1]     | 289 [1]     | 101 [1]      | 211 [1]                |
| Mixed / Other                                              | 5849 [12]   | 3179 [13]   | 1043 [10]    | 1627 [10]              |
| Calendar year                                              | 51645 (100) | 24354 (100) | 10158 (100)  | 17133 (100)            |

{% all cases}{% complete within vaccine status}[% complete within category],

\* Death due to TB in those who died and where cause of death was known

## Model output: All-cause mortality

**Supplementary table S3:** Summary of logistic regression model output with BCG vaccination as the exposure and all-cause mortality as the outcome.

| Variable                                                   | Total | All-cause mortality | Univariable         |         | Multivariable       |         |
|------------------------------------------------------------|-------|---------------------|---------------------|---------|---------------------|---------|
|                                                            |       |                     | OR (95% CI)         | P-value | aOR (95% CI)        | P-value |
| Total cases                                                | 25993 | 807 (3)             |                     |         |                     |         |
| BCG vaccination                                            |       |                     |                     | <0.001  |                     | 0.001   |
| No                                                         | 7620  | 473 (6)             | 1                   |         | 1                   |         |
| Yes                                                        | 18373 | 334 (2)             | 0.28 (0.24 to 0.32) |         | 0.76 (0.64 to 0.89) |         |
| Age                                                        |       |                     |                     | <0.001  |                     | <0.001  |
| Sex                                                        |       |                     |                     | <0.001  |                     | <0.001  |
| Female                                                     | 11502 | 296 (3)             | 1                   |         | 1                   |         |
| Male                                                       | 14491 | 511 (4)             | 1.45 (1.34 to 1.58) |         | 1.48 (1.26 to 1.73) |         |
| IMD rank (with 1 as most deprived and 5 as least deprived) |       |                     |                     | <0.001  |                     | 0.001   |
| 1                                                          | 9891  | 298 (3)             | 1                   |         | 1                   |         |
| 2                                                          | 8136  | 219 (3)             | 0.85 (0.76 to 0.95) |         | 0.86 (0.70 to 1.04) |         |
| 3                                                          | 4100  | 120 (3)             | 1.06 (0.93 to 1.20) |         | 0.66 (0.52 to 0.84) |         |
| 4                                                          | 2341  | 98 (4)              | 1.47 (1.28 to 1.70) |         | 0.72 (0.55 to 0.93) |         |
| 5                                                          | 1525  | 72 (5)              | 1.70 (1.45 to 1.99) |         | 0.64 (0.47 to 0.85) |         |
| UK born                                                    |       |                     |                     | <0.001  |                     | 0.136   |
| Non-UK Born                                                | 19115 | 442 (2)             | 1                   |         | 1                   |         |
| UK Born                                                    | 6878  | 365 (5)             | 2.62 (2.40 to 2.85) |         | 1.25 (0.93 to 1.67) |         |
| Ethnic group                                               |       |                     |                     | <0.001  |                     | 0.171   |
| White                                                      | 4699  | 380 (8)             | 1                   |         | 1                   |         |
| Black-Caribbean                                            | 634   | 25 (4)              | 0.45 (0.35 to 0.58) |         | 0.95 (0.59 to 1.53) |         |
| Black-African                                              | 4681  | 62 (1)              | 0.14 (0.12 to 0.17) |         | 0.87 (0.59 to 1.29) |         |
| Black-Other                                                | 247   | 2 (1)               | 0.13 (0.06 to 0.26) |         | 0.40 (0.10 to 1.69) |         |
| Indian                                                     | 7041  | 168 (2)             | 0.28 (0.25 to 0.31) |         | 0.80 (0.58 to 1.10) |         |
| Pakistani                                                  | 4067  | 103 (3)             | 0.30 (0.27 to 0.34) |         | 0.65 (0.46 to 0.92) |         |
| Bangladeshi                                                | 1079  | 18 (2)              | 0.21 (0.16 to 0.27) |         | 0.69 (0.40 to 1.22) |         |
| Chinese                                                    | 286   | 7 (2)               | 0.34 (0.23 to 0.51) |         | 0.69 (0.30 to 1.62) |         |
| Mixed / Other                                              | 3259  | 42 (1)              | 0.16 (0.13 to 0.19) |         | 0.59 (0.39 to 0.91) |         |
| Calendar year                                              |       |                     | 1.06 (1.04 to 1.08) | <0.001  | 1.10 (1.05 to 1.15) | <0.001  |

OR (95% CI): unadjusted odds ratio with 95% confidence intervals,  
aOR (95% CI): adjusted odds ratios with 95% confidence intervals

### **Secondary exposure: Age at vaccination**

We calculated age at vaccination as year of vaccination minus year of birth. We categorized age at vaccination into 0 to < 1, 1 to < 12, 12 to < 16 and 16+ years because the distribution was bi-modal with modes at 0 and 12 years. This categorization captures the current UK policy of vaccination at birth, historic policy of vaccination at 13-15 years and catch up vaccination for high risk children.

**Supplementary table S4:** Summary of associations between age at vaccination and all outcomes in individuals who were vaccinated - the baseline exposure is vaccination at birth compared to vaccination from 1 to < 12, 12 to < 16, and 16+ years of age.

| Outcome                              | Age at BCG | Univariable |                        |                      |         | Multivariable |                        |                     |         |
|--------------------------------------|------------|-------------|------------------------|----------------------|---------|---------------|------------------------|---------------------|---------|
|                                      |            | Cases*      | Cases with outcome (%) | OR (95% CI)          | P-value | Cases†        | Cases with outcome (%) | aOR (95% CI)        | P-value |
| All-cause mortality                  | < 1        | 5234        | 45 (1)                 | 1                    | <0.001  | 4626          | 43 (1)                 | 1                   | 0.127   |
|                                      | 1 to < 12  | 1915        | 58 (3)                 | 3.60 (2.43 to 5.34)  |         | 1678          | 52 (3)                 | 1.36 (0.85 to 2.16) |         |
|                                      | 12 to < 16 | 1267        | 41 (3)                 | 3.86 (2.51 to 5.91)  |         | 1094          | 32 (3)                 | 0.81 (0.45 to 1.46) |         |
|                                      | ≥ 16       | 408         | 27 (7)                 | 8.17 (5.01 to 13.32) |         | 327           | 25 (8)                 | 1.41 (0.76 to 2.63) |         |
| Death due to TB (in those who died‡) | < 1        | 27          | 20 (74)                | 1                    | 0.118   | 27            | 20 (74)                | 1                   | 0.543   |
|                                      | 1 to < 12  | 43          | 20 (47)                | 0.30 (0.11 to 0.87)  |         | 39            | 18 (46)                | 0.36 (0.08 to 1.51) |         |
|                                      | 12 to < 16 | 23          | 13 (57)                | 0.46 (0.14 to 1.50)  |         | 17            | 9 (53)                 | 0.40 (0.06 to 2.52) |         |
|                                      | ≥ 16       | 17          | 8 (47)                 | 0.31 (0.09 to 1.12)  |         | 17            | 8 (47)                 | 0.35 (0.06 to 2.16) |         |
| Recurrent TB                         | < 1        | 5909        | 284 (5)                | 1                    | 0.463   | 5275          | 258 (5)                | 1                   | 0.246   |
|                                      | 1 to < 12  | 2174        | 105 (5)                | 1.01 (0.80 to 1.26)  |         | 1928          | 92 (5)                 | 0.84 (0.65 to 1.09) |         |
|                                      | 12 to < 16 | 1421        | 58 (4)                 | 0.84 (0.63 to 1.12)  |         | 1242          | 51 (4)                 | 0.70 (0.48 to 1.02) |         |
|                                      | ≥ 16       | 448         | 26 (6)                 | 1.22 (0.81 to 1.85)  |         | 362           | 19 (5)                 | 0.82 (0.49 to 1.37) |         |
| Pulmonary TB                         | < 1        | 5946        | 2828 (48)              | 1                    | <0.001  | 5305          | 2510 (47)              | 1                   | 0.005   |
|                                      | 1 to < 12  | 2194        | 1159 (53)              | 1.23 (1.12 to 1.36)  |         | 1941          | 1033 (53)              | 1.15 (1.02 to 1.29) |         |
|                                      | 12 to < 16 | 1425        | 971 (68)               | 2.36 (2.09 to 2.67)  |         | 1245          | 846 (68)               | 1.09 (0.92 to 1.29) |         |
|                                      | ≥ 16       | 453         | 279 (62)               | 1.77 (1.45 to 2.15)  |         | 364           | 225 (62)               | 1.47 (1.15 to 1.88) |         |
| Sputum smear status - positive       | < 1        | 1753        | 836 (48)               | 1                    | <0.001  | 1557          | 742 (48)               | 1                   | 0.862   |
|                                      | 1 to < 12  | 755         | 394 (52)               | 1.20 (1.01 to 1.42)  |         | 682           | 348 (51)               | 0.96 (0.79 to 1.17) |         |
|                                      | 12 to < 16 | 556         | 357 (64)               | 1.97 (1.62 to 2.40)  |         | 486           | 308 (63)               | 1.06 (0.81 to 1.39) |         |
|                                      | ≥ 16       | 157         | 84 (54)                | 1.26 (0.91 to 1.75)  |         | 131           | 68 (52)                | 0.93 (0.63 to 1.37) |         |

OR (95% CI): unadjusted odds ratio with 95% confidence intervals,

aOR (95% CI): adjusted odds ratios with 95% confidence intervals,

---

\* Univariable sample size for outcomes ordered as in table (% of vaccinated cases) = 8824 (36%), 110 (28%), 9952 (41%), 10018 (41%), 3221 (13%),  
† Multivariable sample size with outcomes ordered as in table (% of vaccinated cases) = 7725 (32%), 100 (25%), 8807 (36%), 8855 (36%), 2856 (12%)  
‡ Death due to TB in those who died and where cause of death was known

---



## Sensitivity analysis of the missing data using multiple imputation

We found that repeating the analysis with an imputed data set had some effect on the results from the complete case analysis. There was a decrease in the accuracy of effect size estimates for BCG vaccination, some increase in p-values (supplementary table S5). However, none of the estimated effects changed their direction, and there were no detectable systematic changes in the results.

For the secondary exposure variables (years since vaccination and age at vaccination, (supplementary table S6 and supplementary table S7), we found a change in direction of the point estimate between years since vaccination and all-cause mortality and recurrent TB, but similar results for age at vaccination and outcomes.

**Supplementary table S5: Summary of associations between BCG vaccination and all outcomes, using pooled imputed data.**

| Outcome                              | Univariable         |         |     | Multivariable       |         |     |
|--------------------------------------|---------------------|---------|-----|---------------------|---------|-----|
|                                      | OR (95% CI)         | P-value | fmi | aOR (95% CI)        | P-value | fmi |
| All-cause mortality                  | 0.44 (0.35 to 0.56) | <0.001  | 90  | 0.76 (0.61 to 0.94) | 0.013   | 85  |
| Death due to TB (in those who died*) | 0.94 (0.57 to 1.56) | 0.810   | 85  | 0.89 (0.52 to 1.51) | 0.651   | 85  |
| Recurrent TB                         | 0.83 (0.75 to 0.92) | <0.001  | 56  | 0.90 (0.81 to 1.00) | 0.058   | 54  |
| Pulmonary TB                         | 0.84 (0.79 to 0.90) | <0.001  | 70  | 0.99 (0.93 to 1.06) | 0.814   | 62  |
| Sputum smear status - positive       | 0.88 (0.82 to 0.94) | <0.001  | 65  | 1.01 (0.94 to 1.08) | 0.886   | 60  |

OR: odds ratio with 95% confidence intervals,

aOR: adjusted odds ratio with 95% confidence intervals,

fmi: fraction of missing information,

\* Death due to TB in those who died and where cause of death was known

**Supplementary table S6: Summary of associations between years since vaccination and all outcomes, using pooled imputed data. There was insufficient data to estimate an effect for deaths due to TB (in those who died)**

| Outcome                              | Univariable              |         |     | Multivariable            |         |     |
|--------------------------------------|--------------------------|---------|-----|--------------------------|---------|-----|
|                                      | OR (95% CI)              | P-value | fmi | aOR (95% CI)             | P-value | fmi |
| All-cause mortality                  | 3.28 (1.85 to 5.79)      | <0.001  | 50  | 12.19 (3.48 to 42.64)    | <0.001  | 70  |
| Death due to TB (in those who died*) | <i>Insufficient data</i> | -       | 0   | <i>Insufficient data</i> | -       | 0   |
| Recurrent TB                         | 1.29 (1.00 to 1.66)      | 0.050   | 39  | 0.81 (0.59 to 1.11)      | 0.187   | 44  |
| Pulmonary TB                         | 0.58 (0.52 to 0.66)      | <0.001  | 33  | 0.99 (0.84 to 1.17)      | 0.913   | 40  |
| Sputum smear status - positive       | 0.99 (0.82 to 1.19)      | 0.891   | 70  | 0.95 (0.77 to 1.18)      | 0.648   | 60  |

OR: odds ratio with 95% confidence intervals,

aOR: adjusted odds ratio with 95% confidence intervals,

fmi: fraction of missing information,

\* Death due to TB in those who died and where cause of death was known

**Supplementary table S7: Summary of associations between age at vaccination and all outcomes, using pooled imputed data (reference is vaccination at <1 year).**

| Outcome                              | Age group (years) | Univariable         |         | Multivariable |                     |         |     |
|--------------------------------------|-------------------|---------------------|---------|---------------|---------------------|---------|-----|
|                                      |                   | OR (95% CI)         | P-value | fmi           | aOR (95% CI)        | P-value | fmi |
| All-cause mortality                  | 1 to < 12         | 6.48 (4.71 to 8.91) | <0.001  | 70            | 1.69 (1.18 to 2.40) | 0.004   | 68  |
|                                      | 12 to < 16        | 3.33 (2.50 to 4.43) | <0.001  | 78            | 1.57 (1.13 to 2.19) | 0.008   | 79  |
|                                      | ≥ 16              | 3.36 (2.56 to 4.41) | <0.001  | 69            | 1.01 (0.70 to 1.46) | 0.948   | 71  |
| Death due to TB (in those who died*) | 1 to < 12         | 0.45 (0.22 to 0.92) | 0.028   | 62            | 0.47 (0.21 to 1.04) | 0.063   | 62  |
|                                      | 12 to < 16        | 0.41 (0.22 to 0.75) | 0.004   | 67            | 0.40 (0.20 to 0.78) | 0.008   | 67  |
|                                      | ≥ 16              | 0.53 (0.28 to 1.00) | 0.051   | 54            | 0.47 (0.20 to 1.12) | 0.088   | 62  |
| Recurrent TB                         | 1 to < 12         | 1.39 (1.11 to 1.73) | 0.004   | 41            | 1.04 (0.82 to 1.32) | 0.736   | 41  |
|                                      | 12 to < 16        | 1.01 (0.88 to 1.16) | 0.892   | 45            | 0.86 (0.75 to 1.00) | 0.052   | 44  |
|                                      | ≥ 16              | 0.95 (0.79 to 1.15) | 0.598   | 53            | 0.77 (0.61 to 0.98) | 0.034   | 55  |
| Pulmonary TB                         | 1 to < 12         | 1.83 (1.59 to 2.10) | <0.001  | 46            | 1.36 (1.17 to 1.58) | <0.001  | 44  |
|                                      | 12 to < 16        | 1.28 (1.19 to 1.36) | <0.001  | 35            | 1.12 (1.04 to 1.21) | 0.002   | 36  |
|                                      | ≥ 16              | 2.28 (2.10 to 2.48) | <0.001  | 34            | 1.10 (0.98 to 1.23) | 0.107   | 40  |
| Sputum smear status - positive       | 1 to < 12         | 1.49 (1.21 to 1.84) | <0.001  | 74            | 1.08 (0.85 to 1.37) | 0.549   | 76  |
|                                      | 12 to < 16        | 1.29 (1.17 to 1.43) | <0.001  | 65            | 1.09 (0.97 to 1.22) | 0.158   | 67  |
|                                      | ≥ 16              | 2.40 (2.16 to 2.66) | <0.001  | 58            | 1.20 (1.04 to 1.37) | 0.011   | 59  |

OR: odds ratio with 95% confidence intervals,

aOR: adjusted odds ratio with 95% confidence intervals,

fmi: fraction of missing information,

\* Death due to TB in those who died and where cause of death was known

## Sensitivity analysis of the study population

**Supplementary table S8:** Summary of associations between BCG vaccination and all outcomes; cases that have no recurrent flag in the ETS (50407), and cases that would have been eligible for the BCG schools scheme (9943). Those defined to be eligible for the schools scheme are the UK born, that were aged 14 or over in 2004

| Study population                      | Outcome                              | BCG                 | Univariable         |                     | Multivariable       |         |
|---------------------------------------|--------------------------------------|---------------------|---------------------|---------------------|---------------------|---------|
|                                       |                                      |                     | OR (95% CI)         | P-value             | aOR (95% CI)        | P-value |
| Recurrent cases dropped               | All-cause mortality                  | No                  | 1                   |                     | 1                   |         |
|                                       |                                      | Yes                 | 0.27 (0.23 to 0.31) | <0.001              | 0.73 (0.61 to 0.86) | <0.001  |
|                                       | Death due to TB (in those who died*) | No                  | 1                   |                     | 1                   |         |
|                                       |                                      | Yes                 | 0.94 (0.68 to 1.31) | 0.709               | 0.74 (0.49 to 1.11) | 0.147   |
|                                       | Recurrent TB                         | No                  | 1                   |                     | 1                   |         |
|                                       |                                      | Yes                 | 0.61 (0.55 to 0.69) | <0.001              | 0.76 (0.66 to 0.87) | <0.001  |
|                                       | Pulmonary TB                         | No                  | 1                   |                     | 1                   |         |
|                                       |                                      | Yes                 | 0.83 (0.79 to 0.87) | <0.001              | 0.99 (0.93 to 1.04) | 0.672   |
| Sputum smear status - positive        | No                                   | 1                   |                     | 1                   |                     |         |
|                                       | Yes                                  | 0.94 (0.88 to 1.02) | 0.141               | 1.01 (0.92 to 1.10) | 0.871               |         |
| Cases eligible for the schools scheme | All-cause mortality                  | No                  | 1                   |                     | 1                   |         |
|                                       |                                      | Yes                 | 0.24 (0.19 to 0.29) | <0.001              | 0.72 (0.55 to 0.95) | 0.018   |
|                                       | Death due to TB (in those who died*) | No                  | 1                   |                     | 1                   |         |
|                                       |                                      | Yes                 | 0.96 (0.57 to 1.63) | 0.893               | 0.99 (0.49 to 2.03) | 0.987   |
|                                       | Recurrent TB                         | No                  | 1                   |                     | 1                   |         |
|                                       |                                      | Yes                 | 0.51 (0.42 to 0.61) | <0.001              | 0.66 (0.52 to 0.84) | <0.001  |
|                                       | Pulmonary TB                         | No                  | 1                   |                     | 1                   |         |
|                                       |                                      | Yes                 | 0.87 (0.78 to 0.98) | 0.017               | 0.94 (0.82 to 1.08) | 0.417   |
|                                       | Sputum smear status - positive       | No                  | 1                   |                     | 1                   |         |
|                                       |                                      | Yes                 | 1.04 (0.89 to 1.22) | 0.613               | 1.05 (0.87 to 1.27) | 0.588   |

OR: odds ratio with 95% confidence intervals,

aOR: adjusted odds ratio with 95% confidence intervals,

\* Death due to TB in those who died and where cause of death was known

## Estimated power

Power estimates were calculated in both the univariable and multivariable datasets for all outcomes. This represents an over estimate of the statistical power, as only a single exposure variable was accounted for, and age at vaccination has been simplified to a binary vaccinated at birth variable (supplementary table S9).

**Supplementary table S9:** Summary of the estimated power for each analysis, for both the univariable and multivariable data sets, with alpha set as 0.05. Power estimates assume a single exposure variable, and age at vaccination has been simplified into a binary vaccinated at birth variable

| Exposure                                                      | Outcomes            |                                      |              |              |                                |
|---------------------------------------------------------------|---------------------|--------------------------------------|--------------|--------------|--------------------------------|
|                                                               | All-cause mortality | Death due to TB (in those who died*) | Recurrent TB | Pulmonary TB | Sputum smear status - positive |
| <b>BCG vaccination</b>                                        |                     |                                      |              |              |                                |
| Univariable                                                   | 100%                | 5%                                   | 100%         | 100%         | 26%                            |
| Multivariable                                                 | 100%                | 3%                                   | 100%         | 100%         | 27%                            |
| <b>Years since BCG vaccine</b>                                |                     |                                      |              |              |                                |
| Univariable                                                   | 81%                 | 0%                                   | 80%          | 100%         | 3%                             |
| Multivariable                                                 | 64%                 | 0%                                   | 92%          | 100%         | 5%                             |
| <b>Age since vaccination (vaccination at birth vs. older)</b> |                     |                                      |              |              |                                |
| Univariable                                                   | 100%                | 62%                                  | 5%           | 100%         | 100%                           |
| Multivariable                                                 | 100%                | 66%                                  | 9%           | 100%         | 99%                            |
